# Supplementary material
Source: PubMed Central journal article supplement (PMC7429357)
Supplement: NIHMS1610450-supplement-SI.pdf [file NIHMS1610450-supplement-SI.pdf]

## Supporting Information

### Probing the Plasticity in the Active Site of Protein N-terminal

#### Methyltransferase 1 Using Bisubstrate Analogs

*Dongxing Chen<sup>†</sup>, Cheng Dong<sup>§</sup>, Guangping Dong<sup>†</sup>, Karthik Srinivasan<sup>‡</sup>, Jinrong Min<sup>§</sup>, Nicholas Noinaj<sup>‡</sup>, and Rong Huang<sup>†,\*</sup>*

<sup>†</sup>Department of Medicinal Chemistry and Molecular Pharmacology, Center for Cancer Research, Institute for Drug Discovery, Purdue University, West Lafayette, Indiana 47907, United States.

<sup>§</sup>Structural Genomics Consortium, Department of Physiology, University of Toronto, Toronto, Ontario M5G 1L7, Canada.

<sup>‡</sup>Markey Center for Structural Biology, Department of Biological Sciences and the Purdue Institute of Inflammation, Immunology and Infectious Disease, Purdue University, West Lafayette, Indiana 47907, United States.

\* Correspondence should be addressed to R.H. (huang-r@purdue.edu)

#### Table of Contents

- A. NMR and MS spectra of compound **15a-b**, **18-19** and **22-24**
- B. NMR, MALDI-MS and LC-MS/HPLC spectra of compound **1-12**
- C. Figure S1. Methylation assay of compounds **10-12** for NTMT1.
- D. Figure S2. MALDI-MS methylation inhibition assay compound **8**.
- E. Table S1. Selectivity evaluation of compound **3**
- F. Table S2. Crystallography data and refinement statistics (PDB ID: 6WJ7 and 6PVB).

NMR spectra of compound 15a

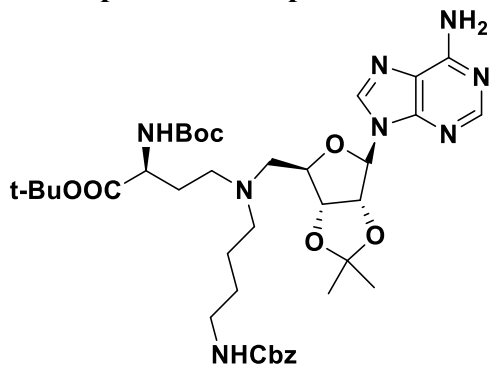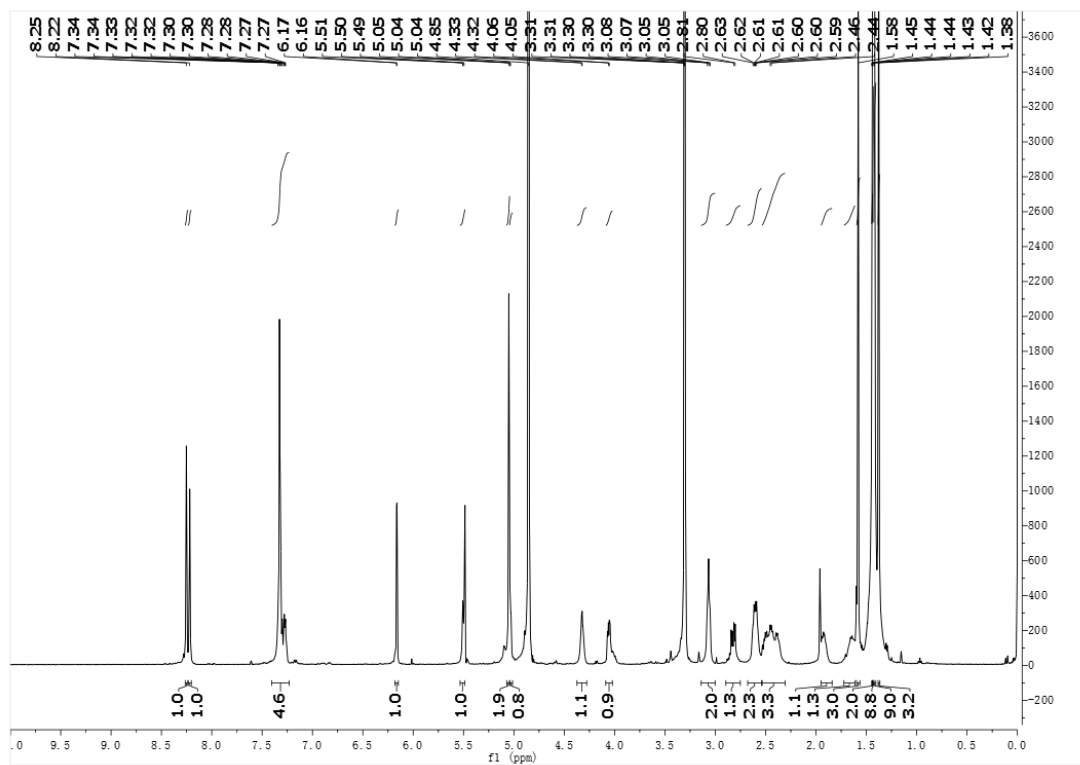

# NMR spectra of compound 15b

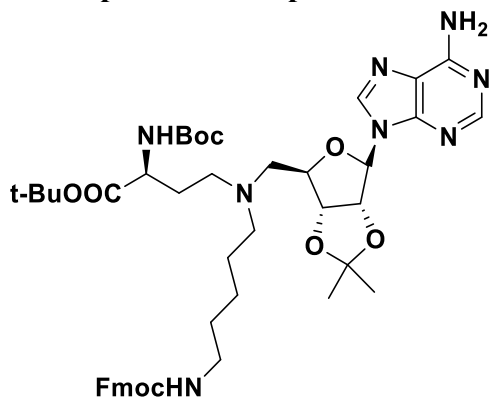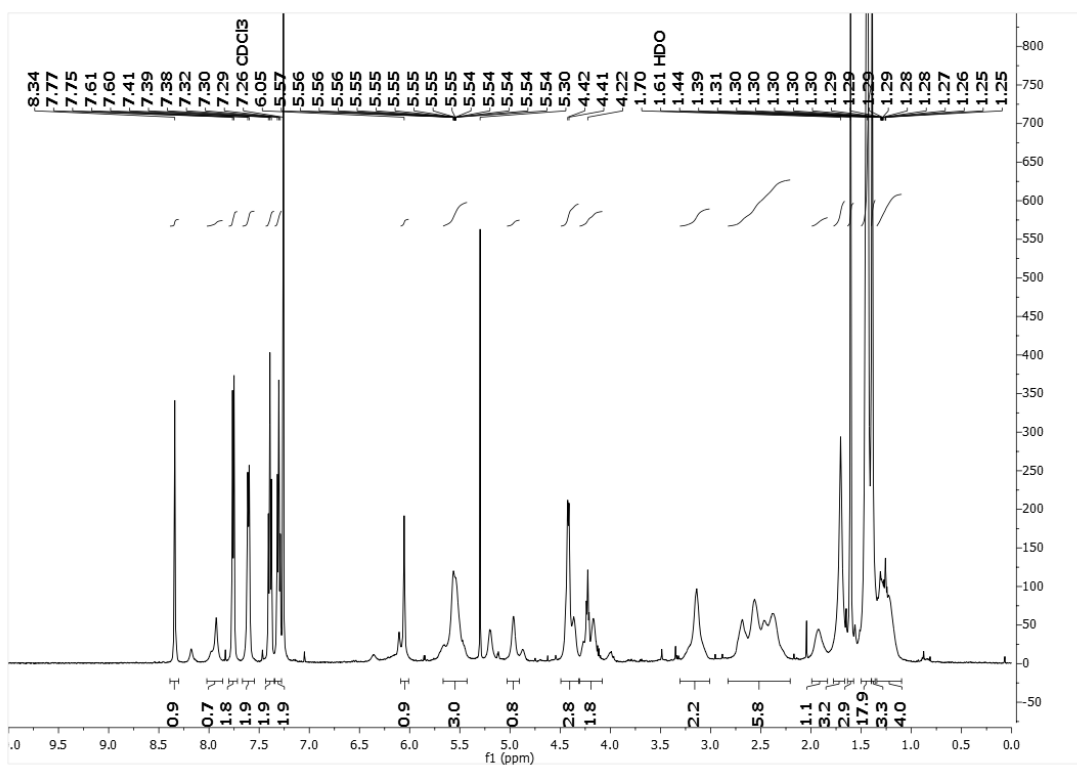

# NMR spectra of compound 18

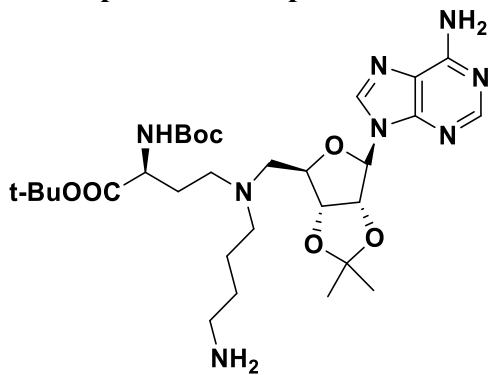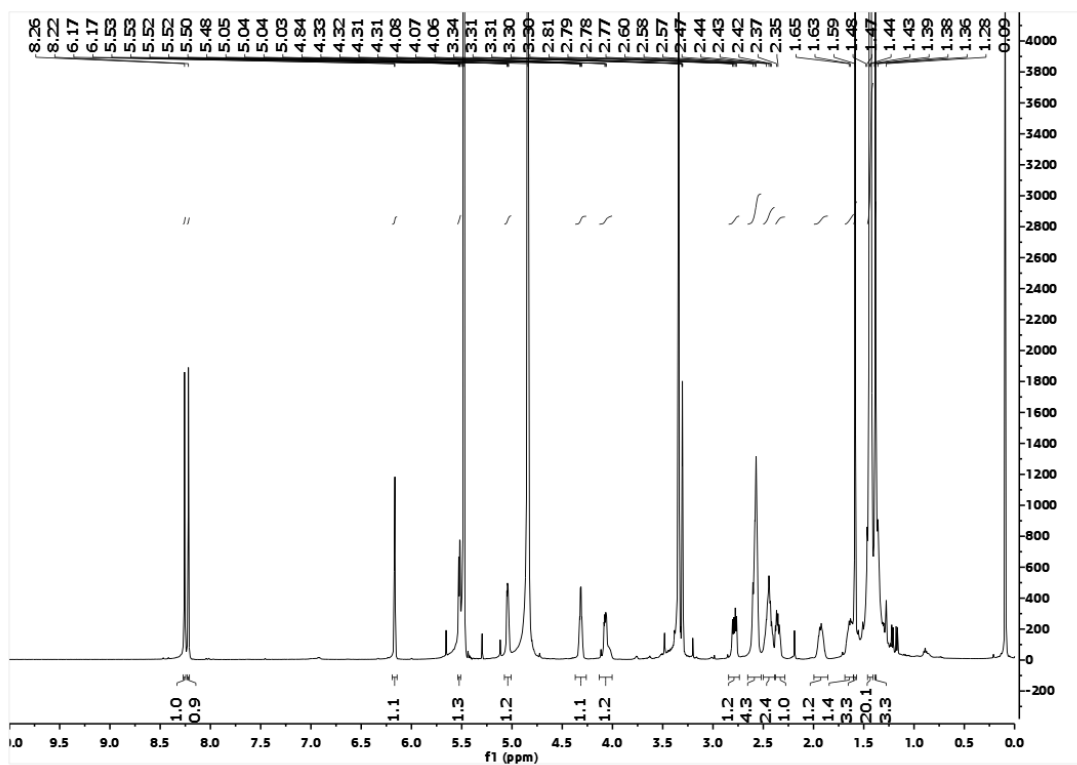

## NMR and MS spectra of compound 19

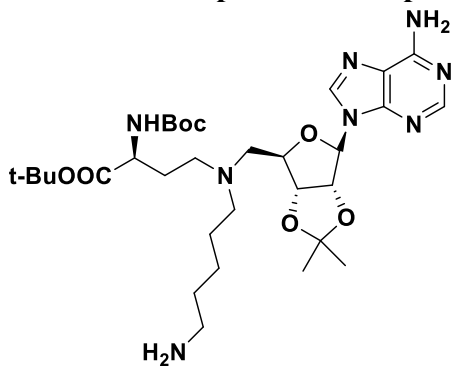

## NMR spectra of compound 19

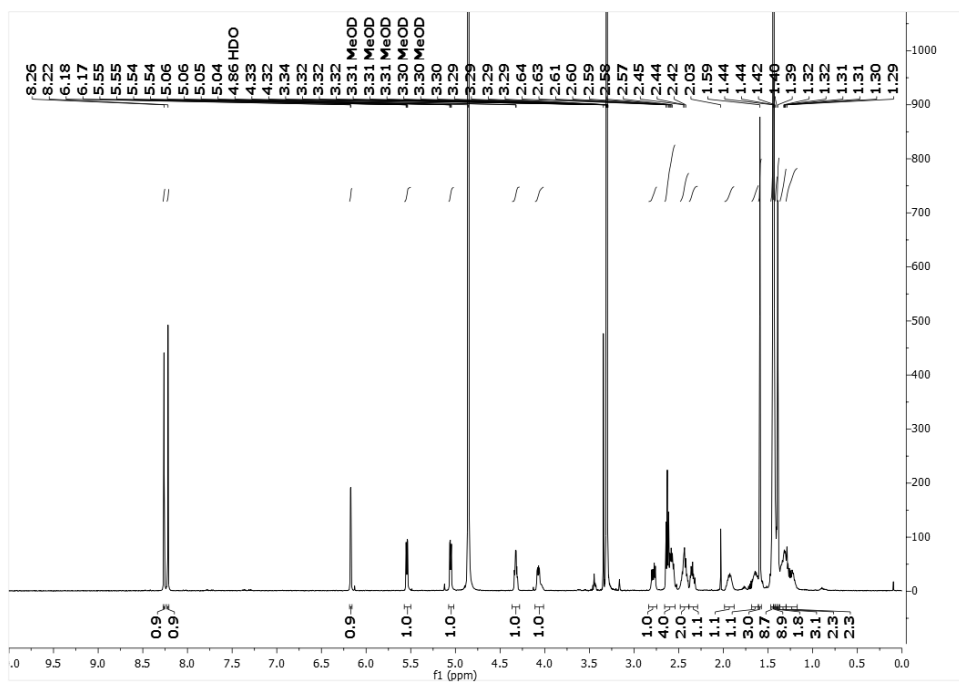

# MS spectra of compound **19**

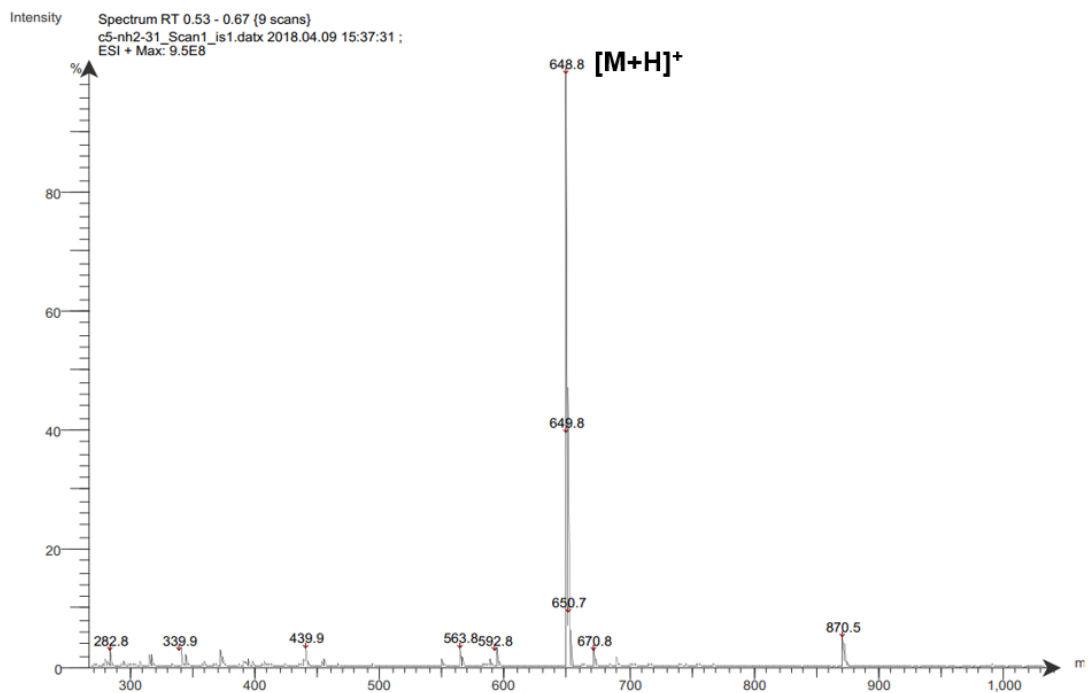

## NMR and MS spectra of compound 22

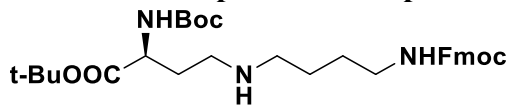

## NMR spectra of compound 22

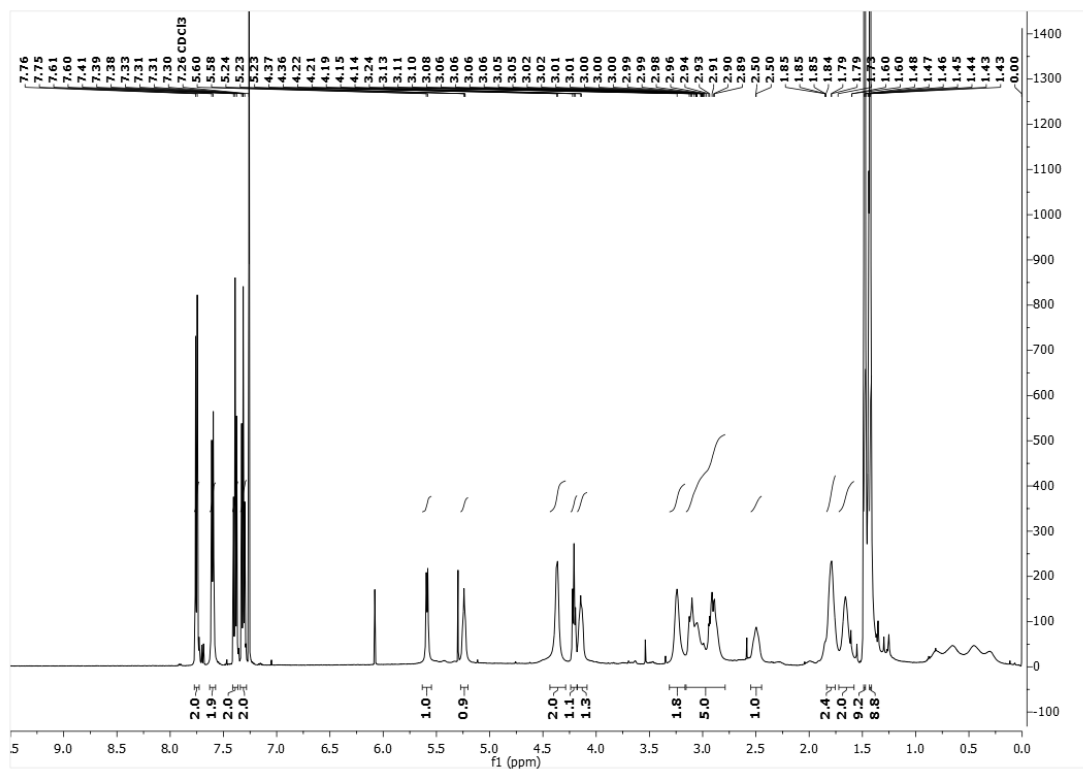

## MS spectra of compound 22

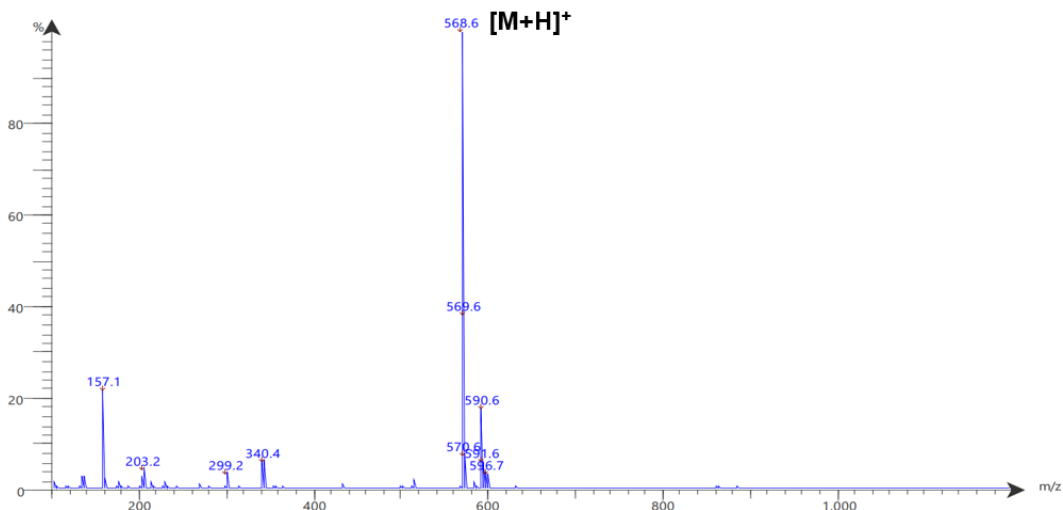

# NMR spectra of compound 23

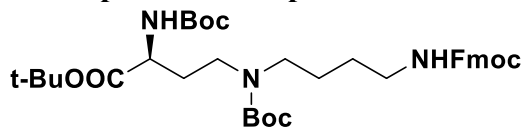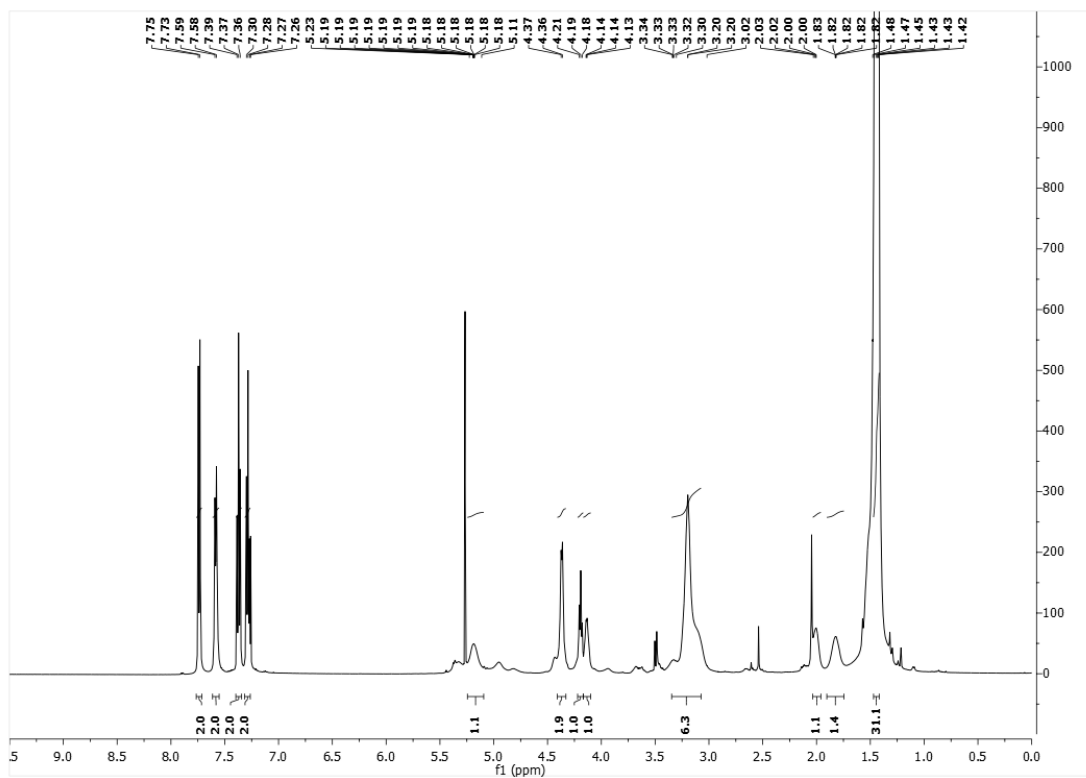



# NMR spectra of compound 24

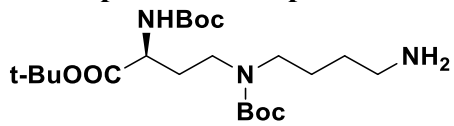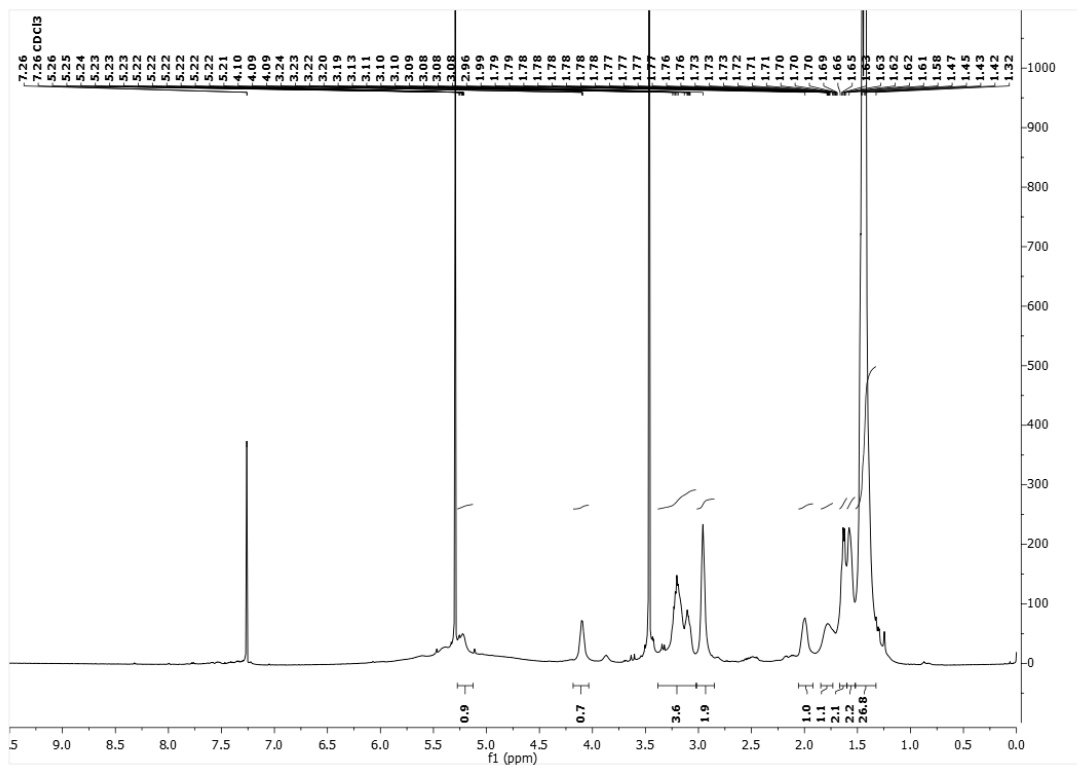

## MALDI-MS and LC-MS spectra of compound 1

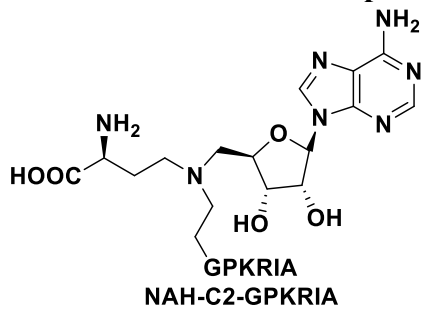

### MALDI-MS spectra of compound 1

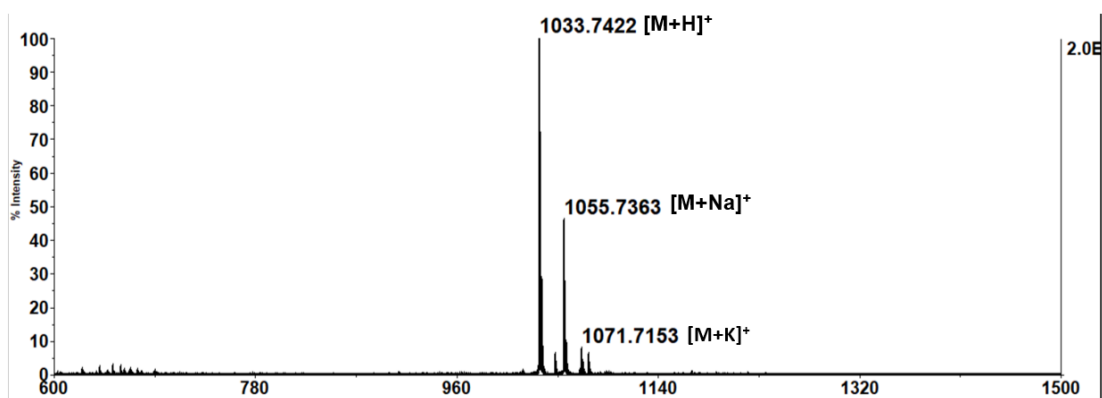

### LC-MS spectra of compound 1

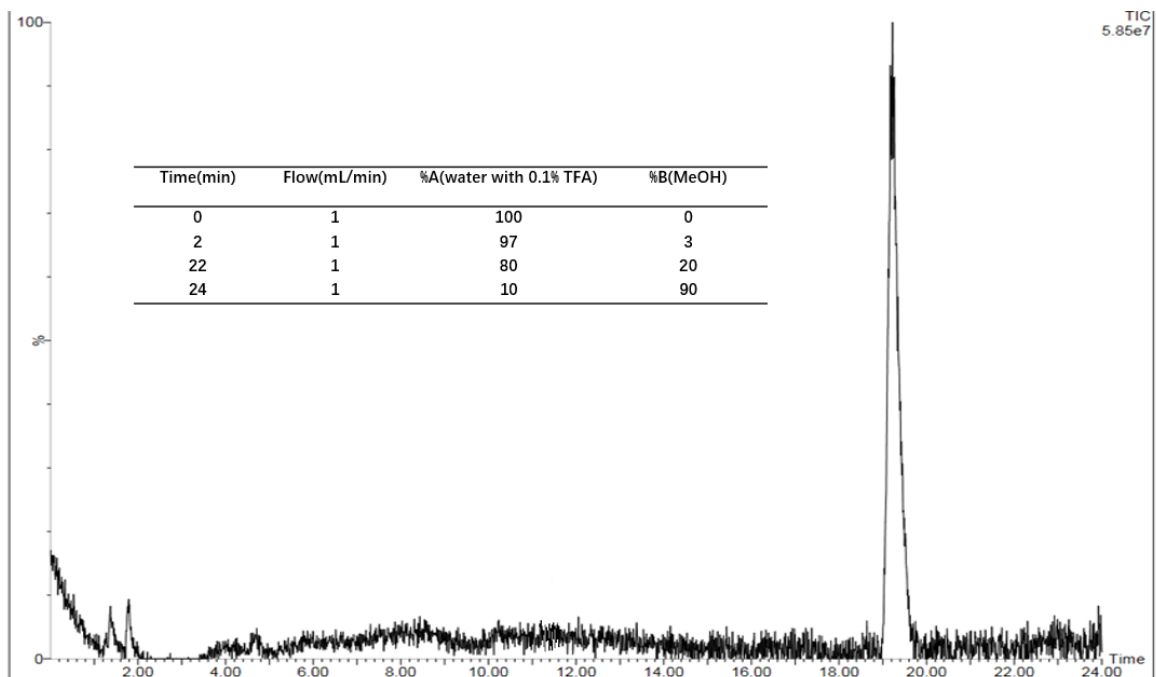

## MALDI-MS and LC-MS spectra of compound 2

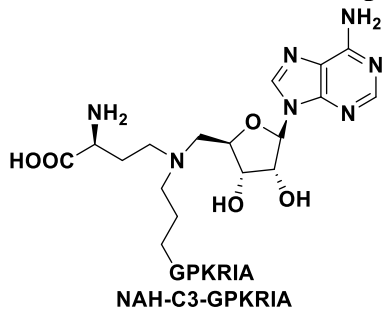

### MALDI-MS spectra of compound 2

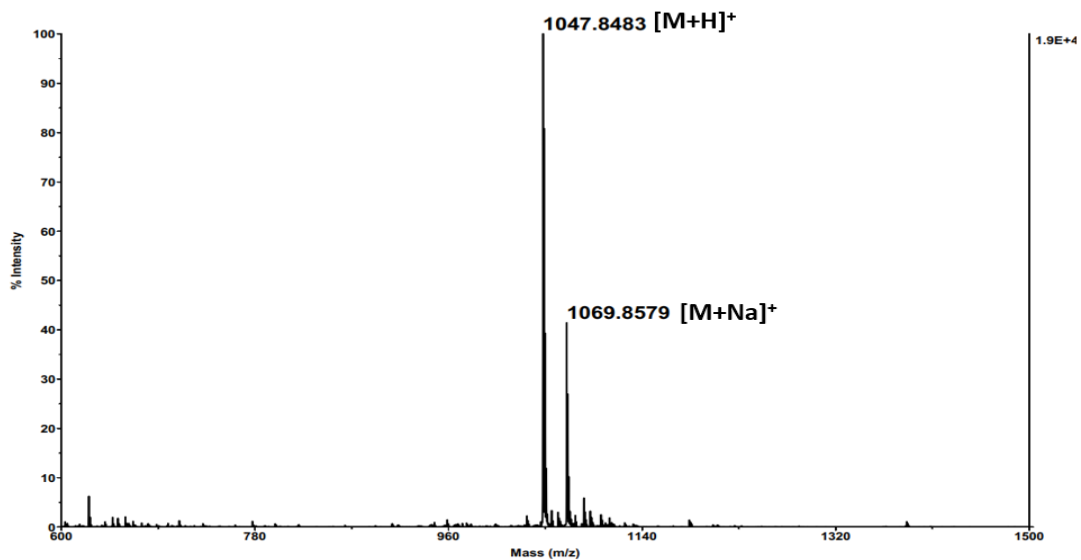

### LC-MS spectra of compound 2

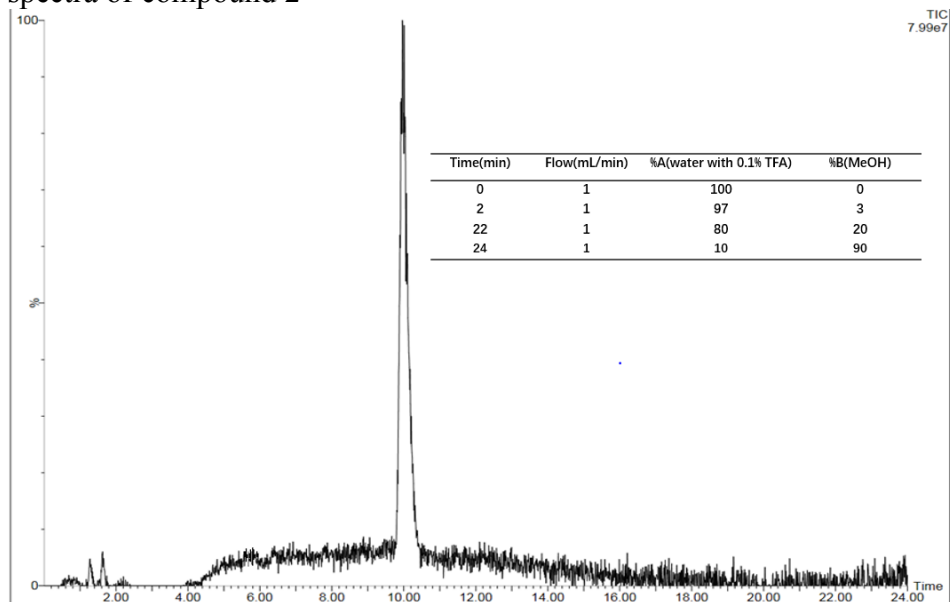

### MALDI-MS and LC-MS spectra of compound 3

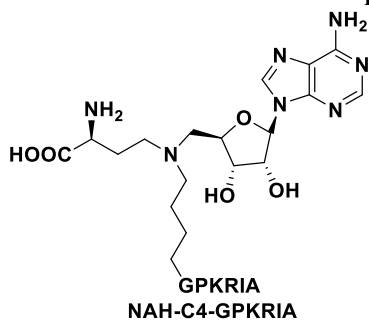

### MALDI-MS spectra of compound 3

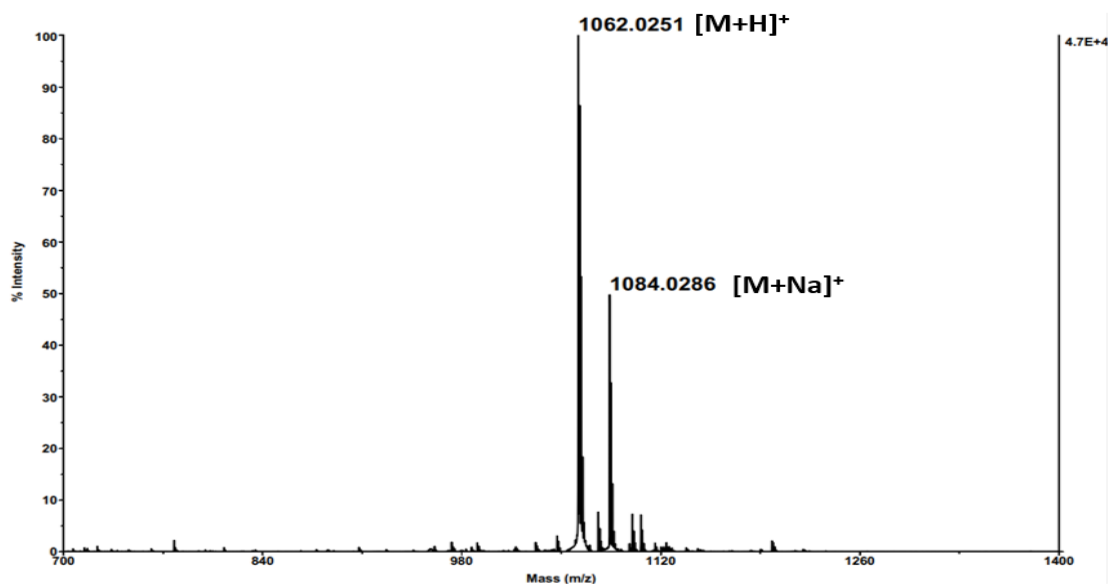

### LC-MS spectra of compound 3

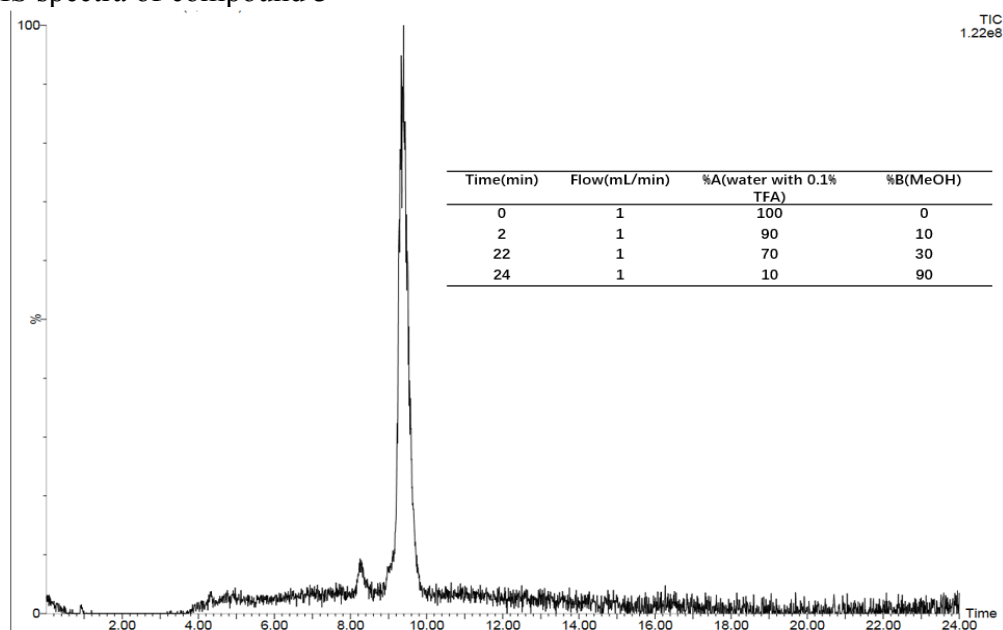

## MALDI-MS and LC-MS spectra of compound 4

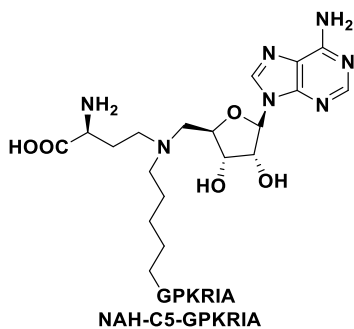

### MALDI-MS spectra of compound 4

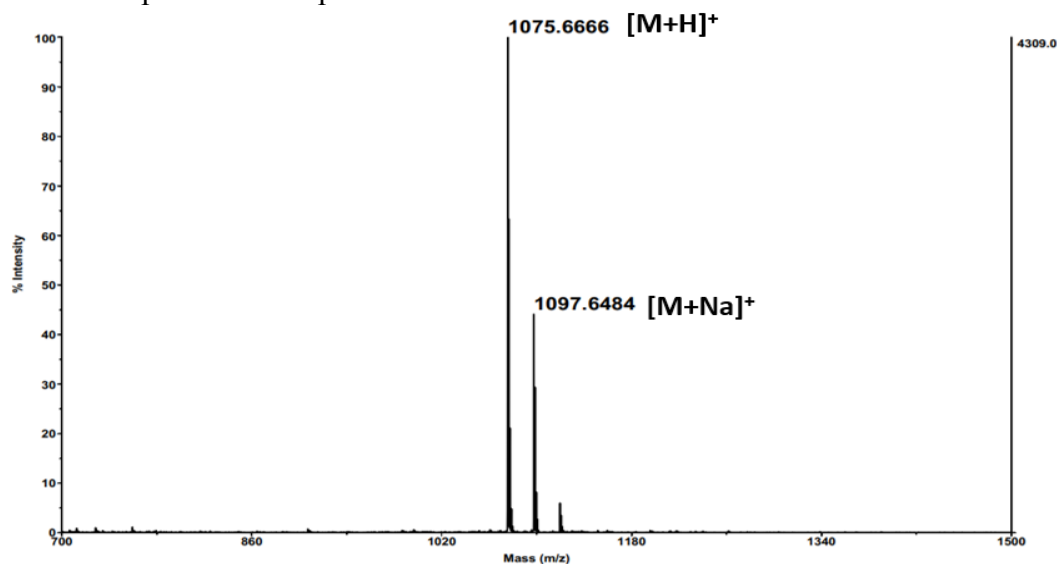

### LC-MS spectra of compound 4

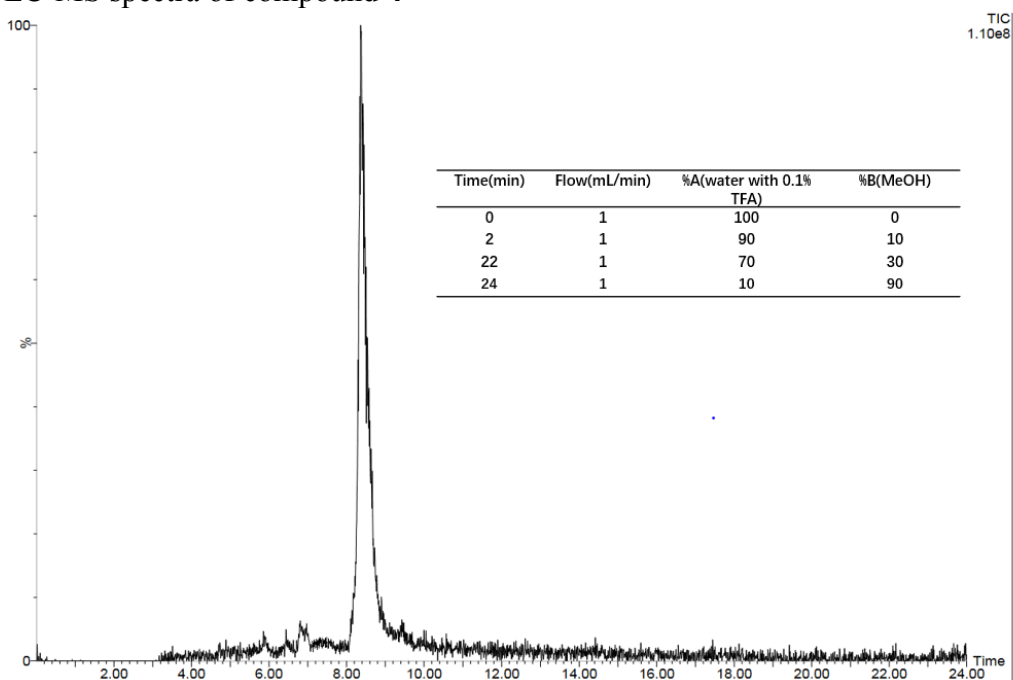

# MALDI-MS and LC-MS spectra of compound 5

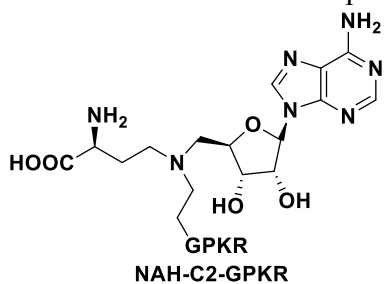

## MALDI-MS spectra of compound 5

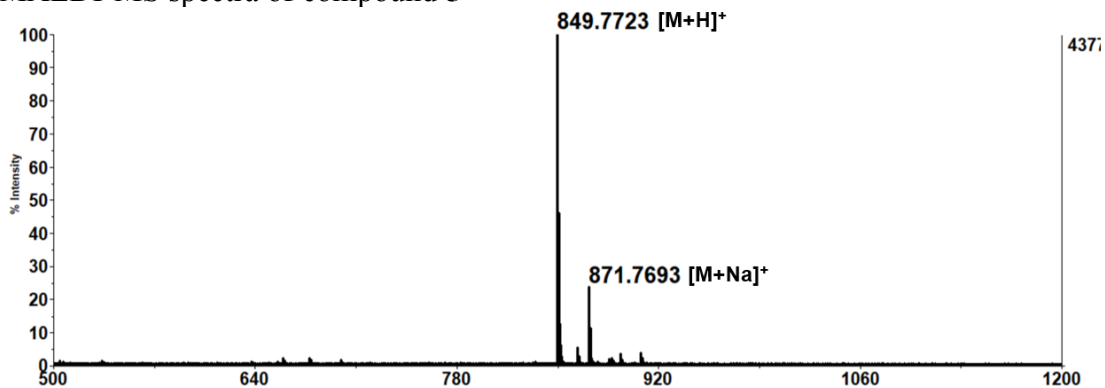

## LC-MS spectra of compound 5

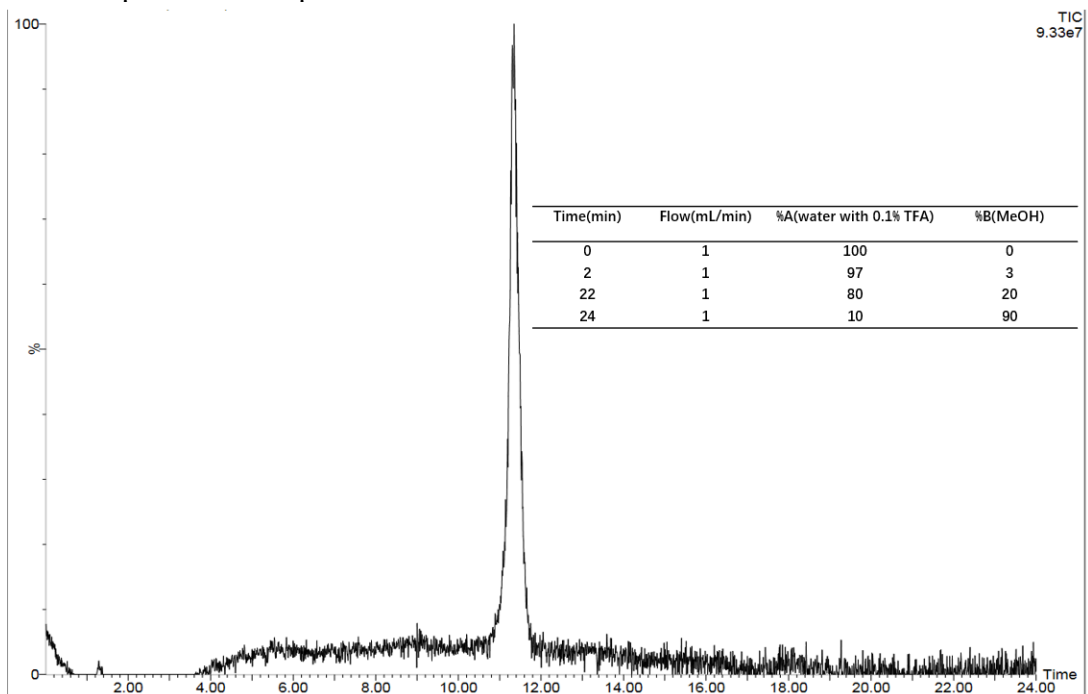

MALDI-MS and LC-MS spectra of compound 6

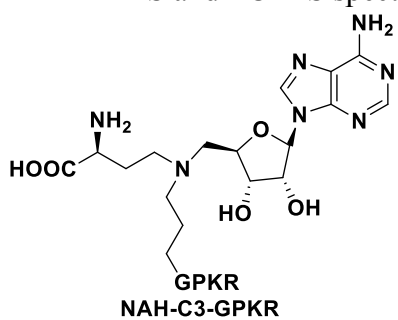

MALDI-MS spectra of compound 6

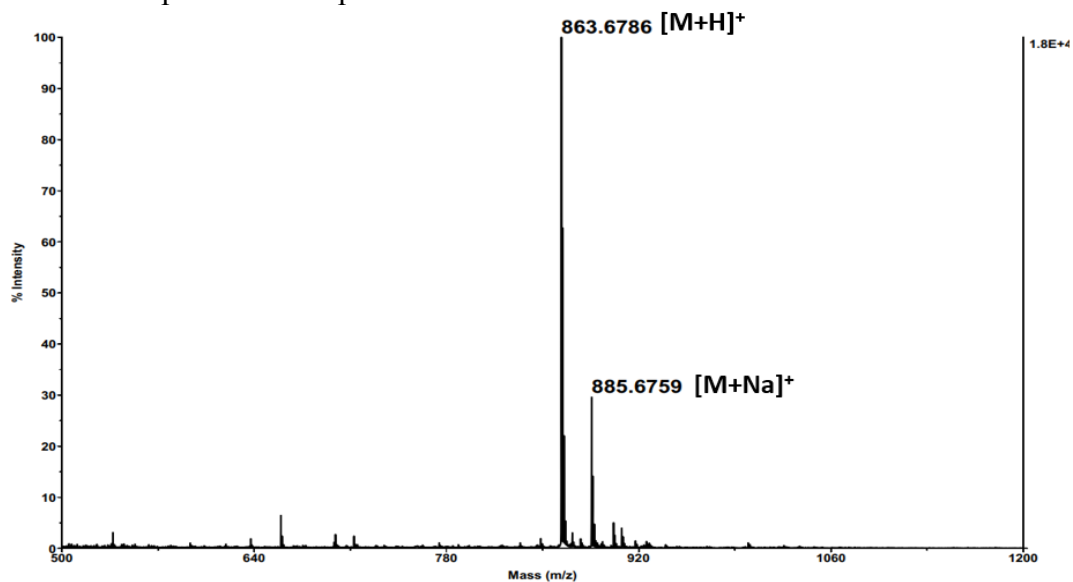

LC-MS spectra of compound 6

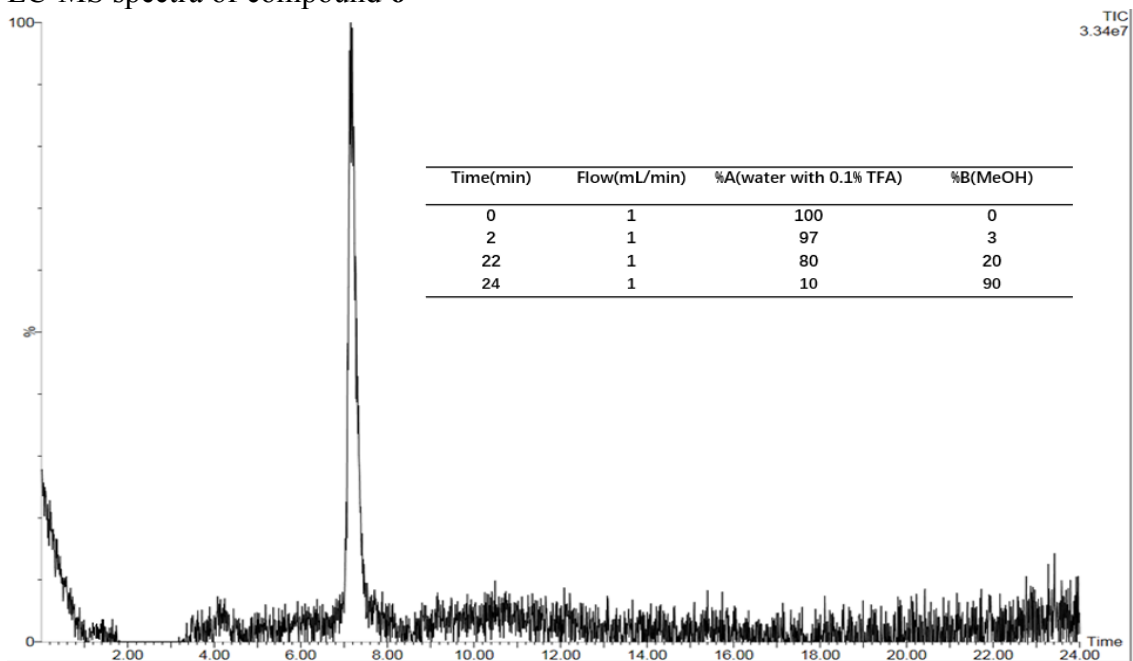

## MALDI-MS and HPLC spectra of compound 7

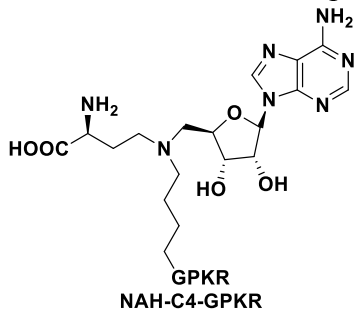

## MALDI-MS spectra of compound 7

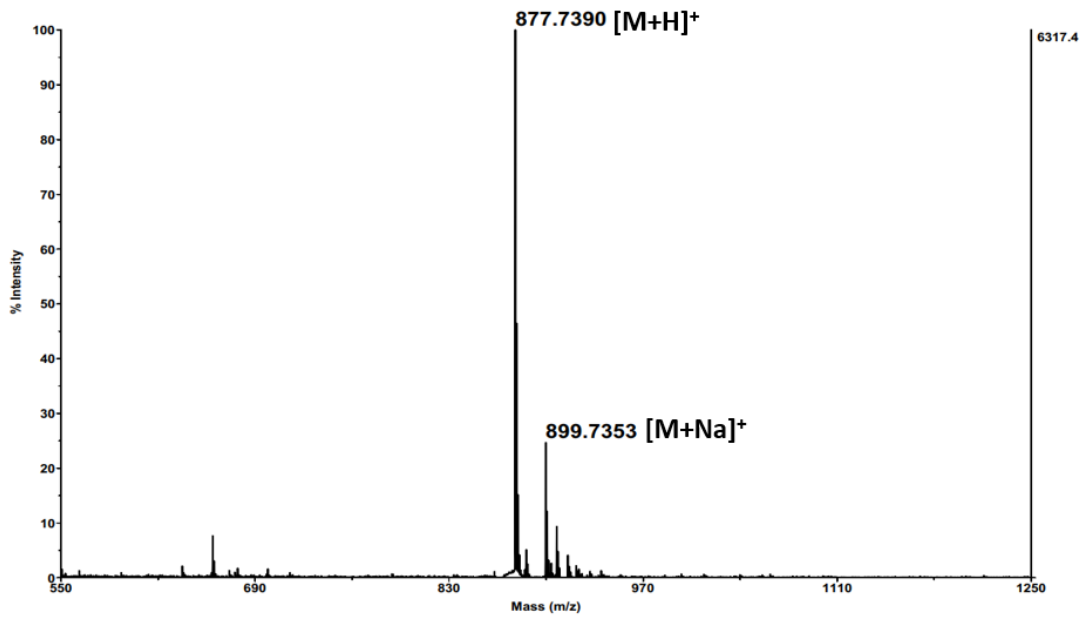

## HPLC spectra of compound 7

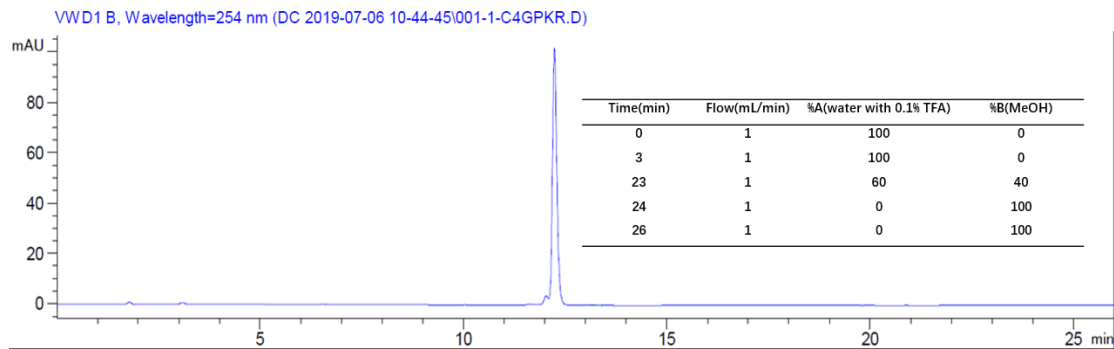



NMR, MALDI-MS and HPLC spectra of compound **8**

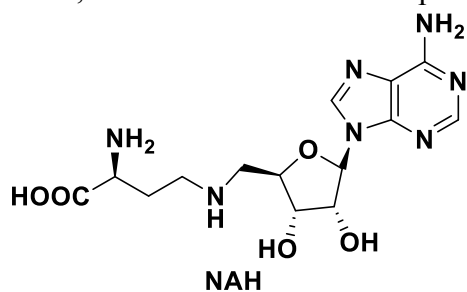

NMR spectra of compound **8**

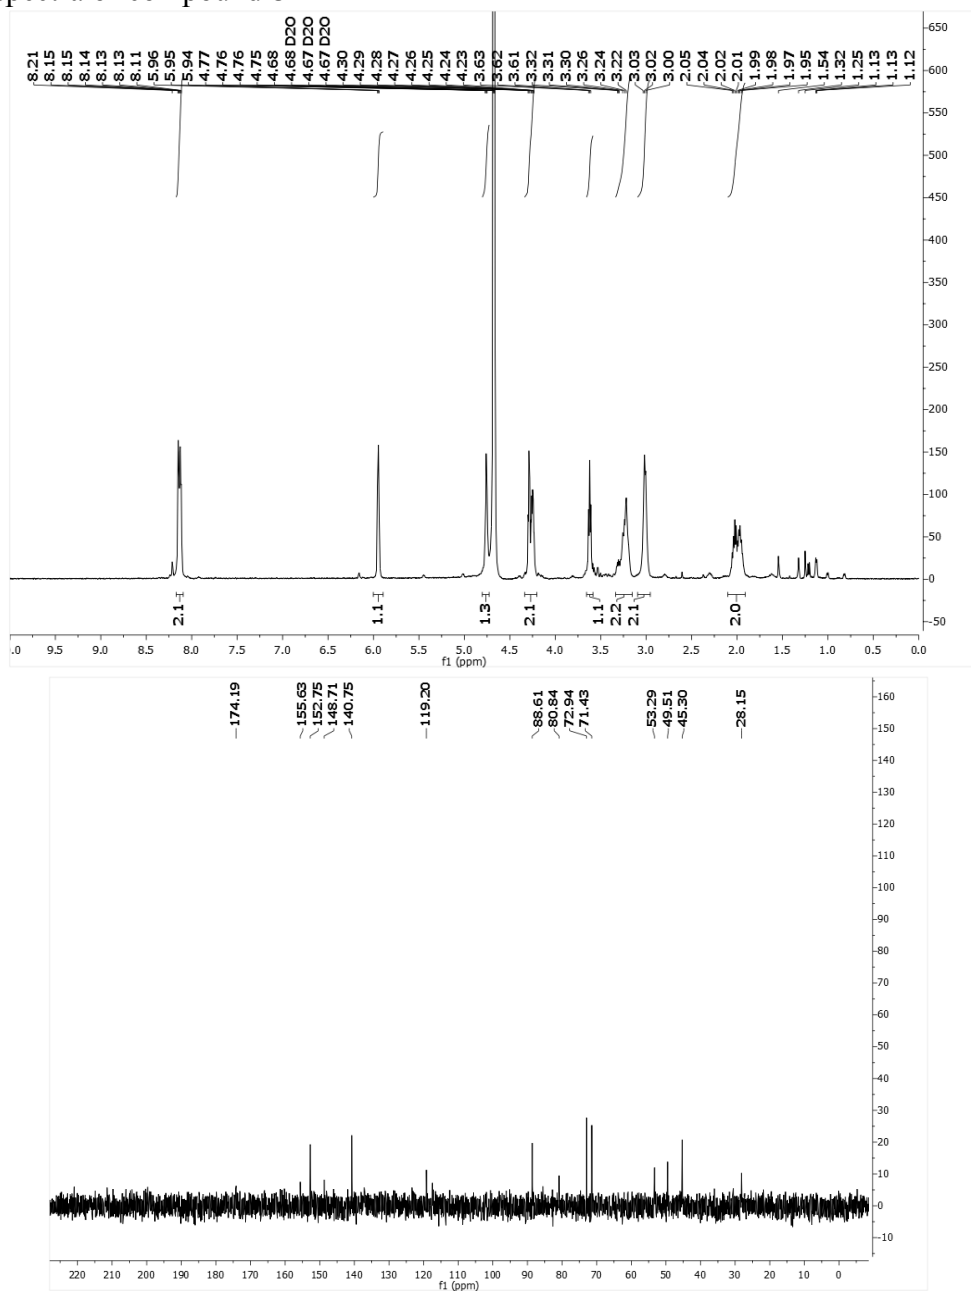

## MALDI-MS spectra of compound **8**

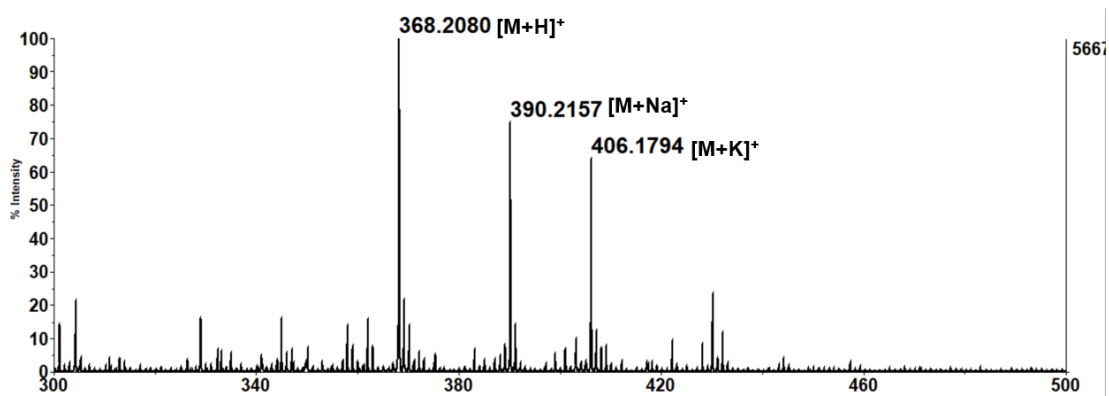

## HPLC spectra of compound **8**

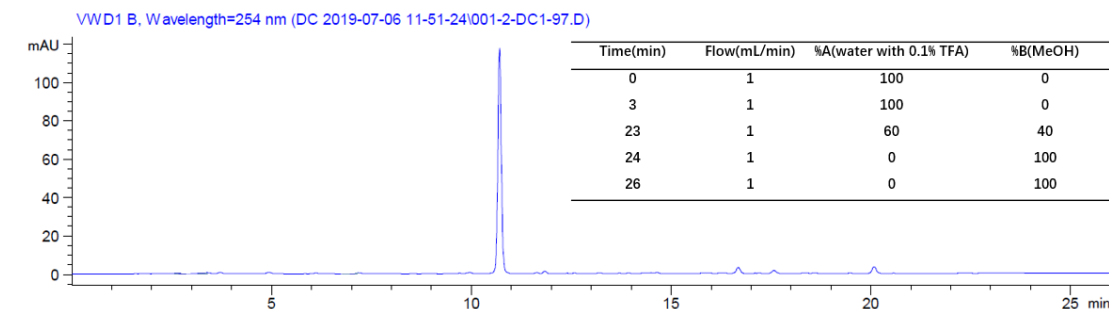

# NMR, MALDI-MS and HPLC spectra of compound 9

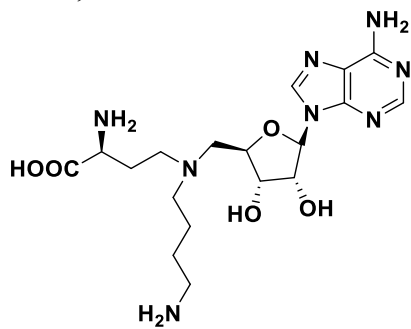

## NMR spectra of compound 9

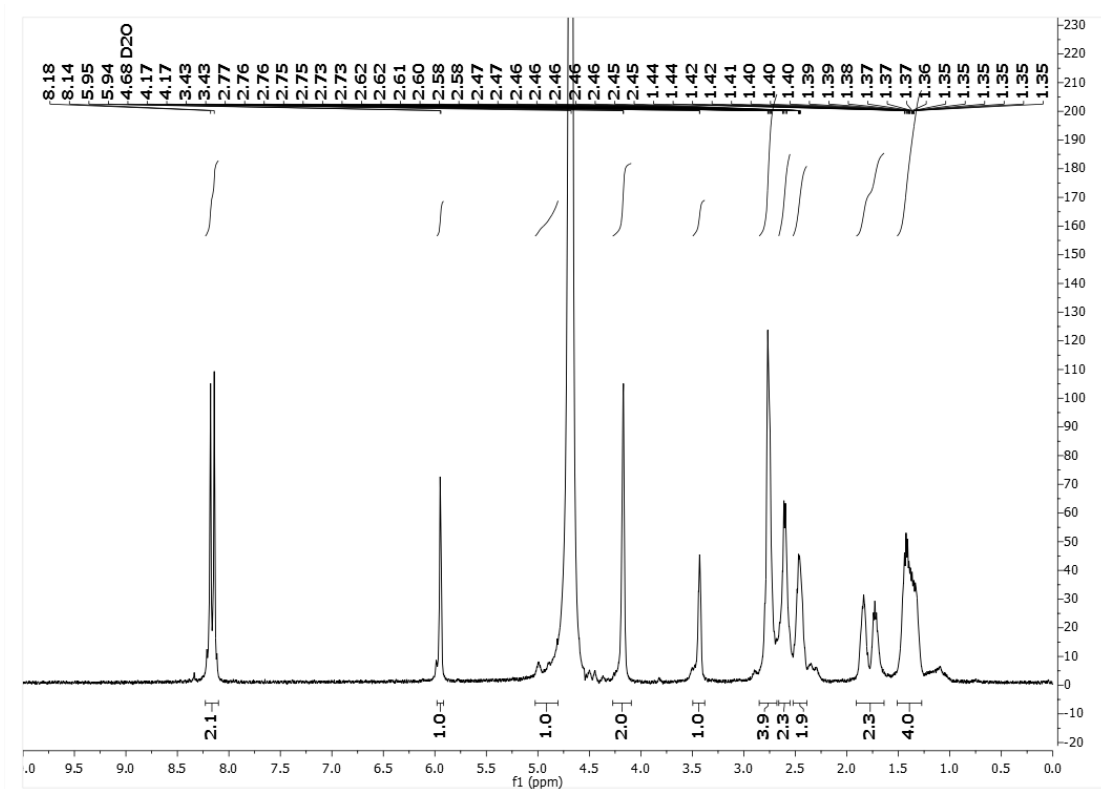

## MALDI-MS spectra of compound 9

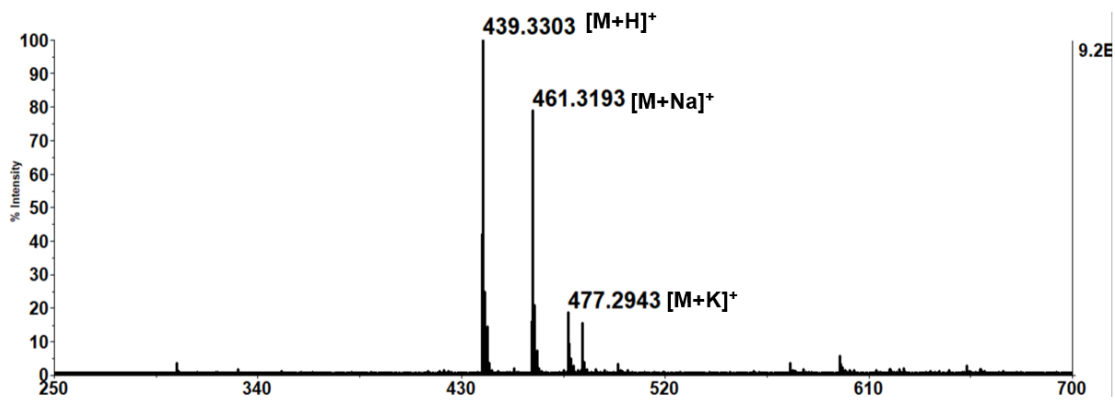

## HPLC spectra of compound 9

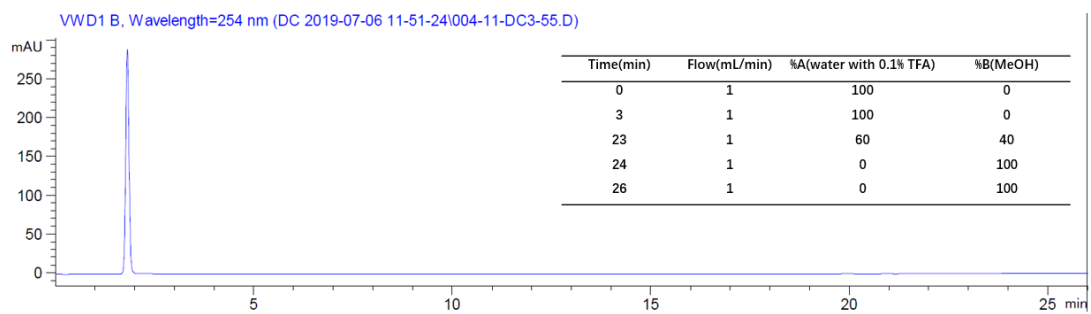

MALDI-MS and LC-MS spectra of compound **10**

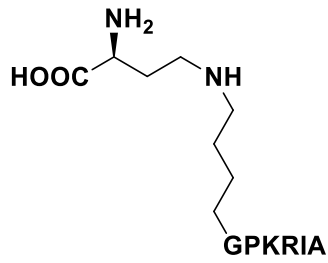

MALDI-MS spectra of compound **10**

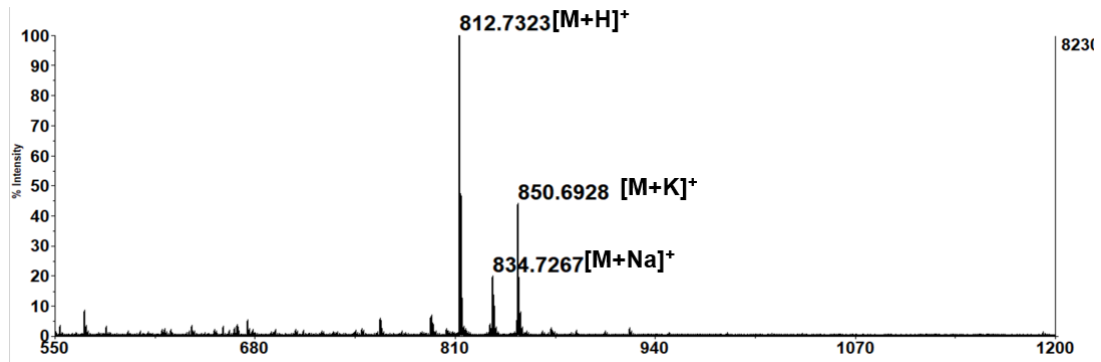

LC-MS spectra of compound **10**

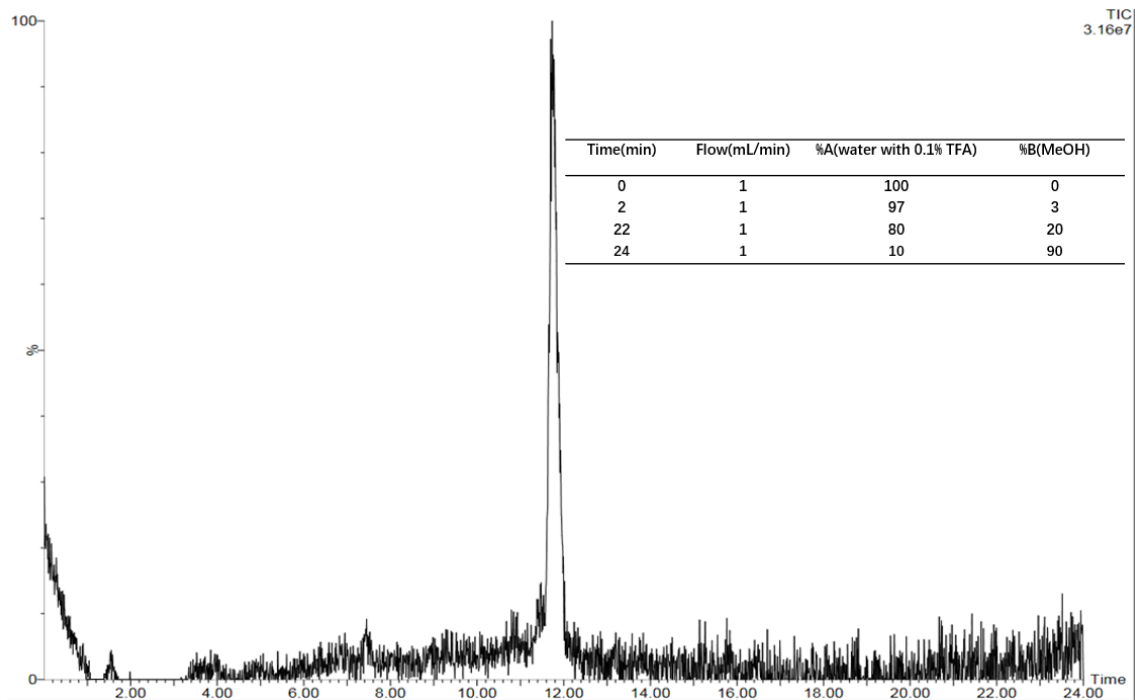

# MALDI-MS and LC-MS spectra of compound 11

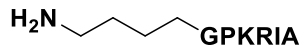

## MALDI-MS spectra of compound 11

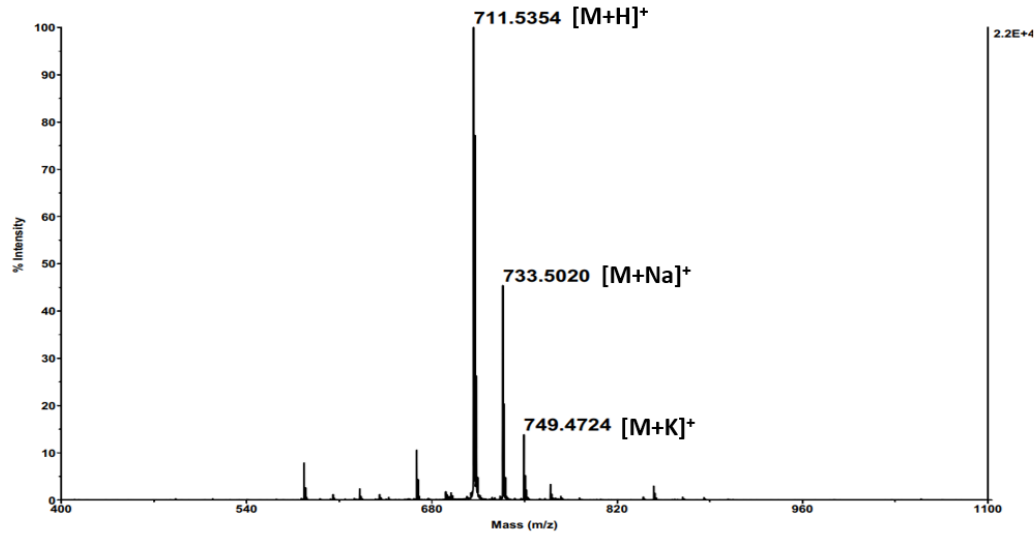

## LC-MS spectra of compound 11

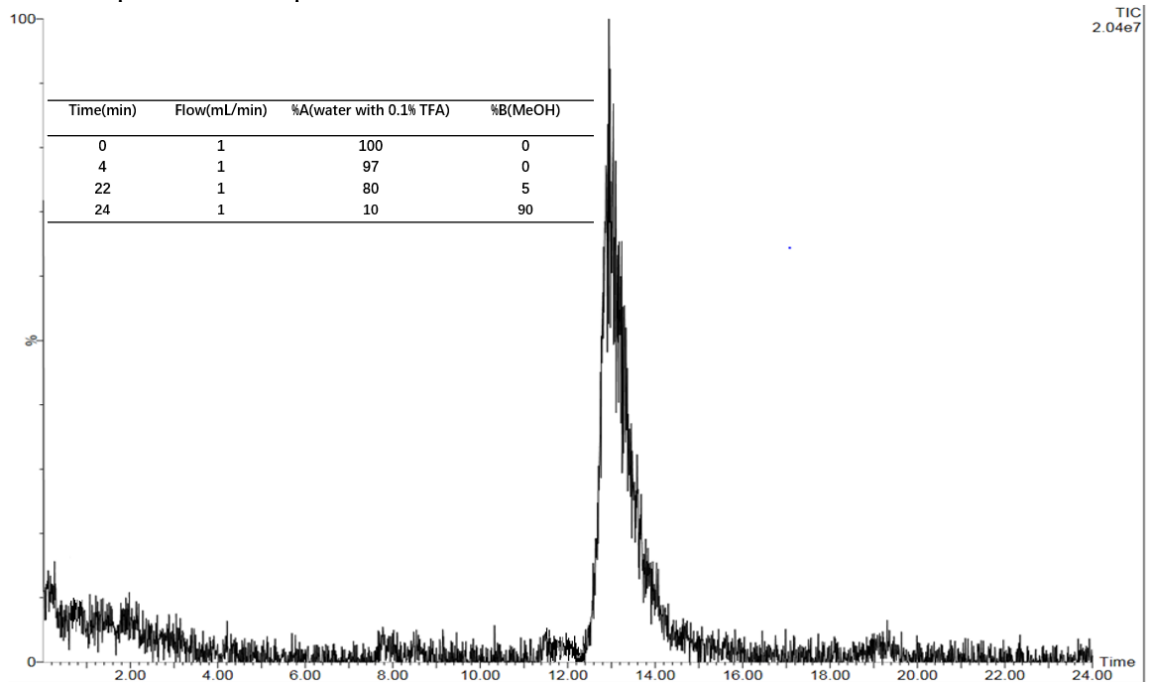

## MALDI-MS and HPLC spectra of compound **12**

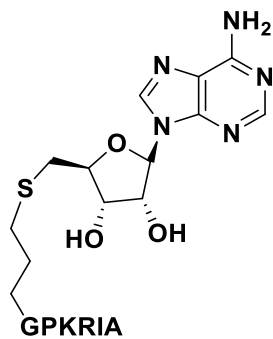

### MALDI-MS spectra of compound **12**

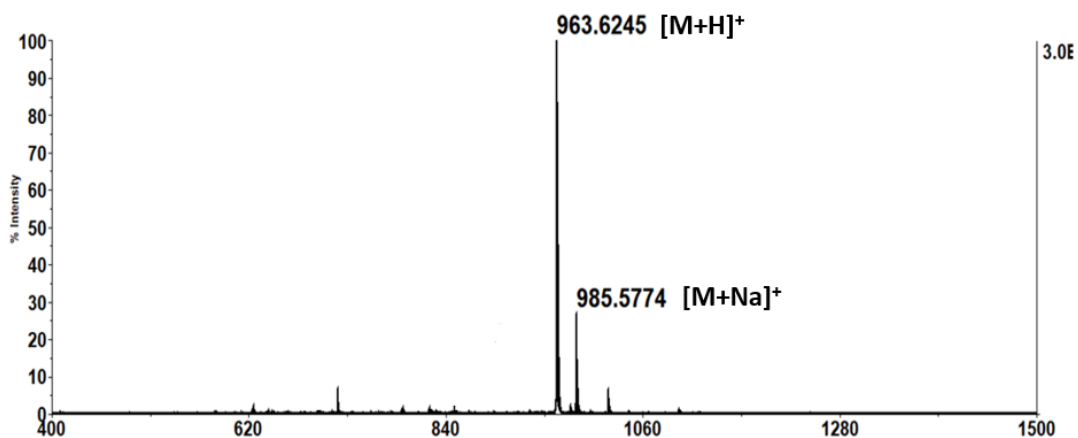

### HPLC spectra of compound **12**

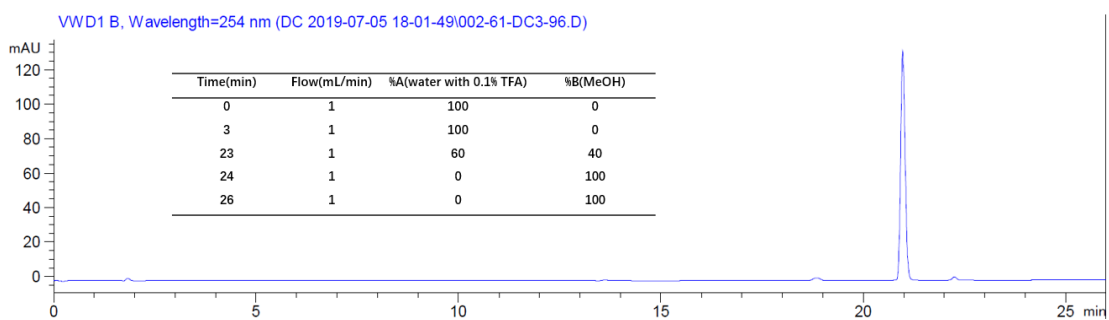

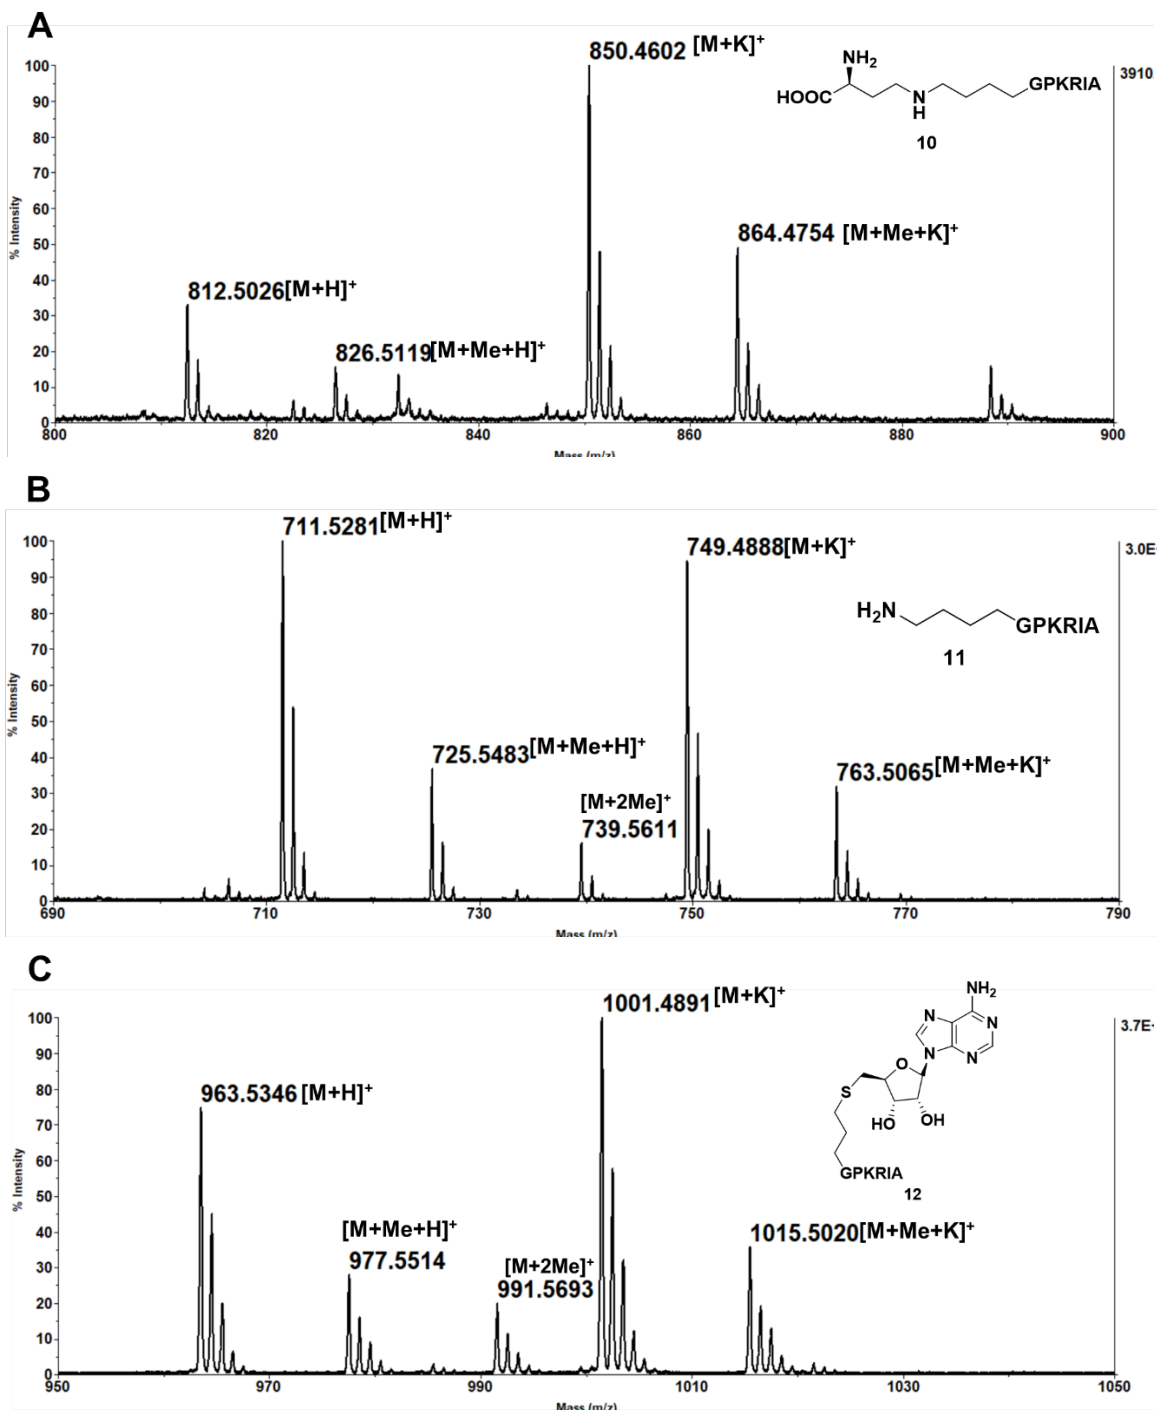

Supporting Figure S1. Methylation assay of compounds 10-12 for NTMT1.



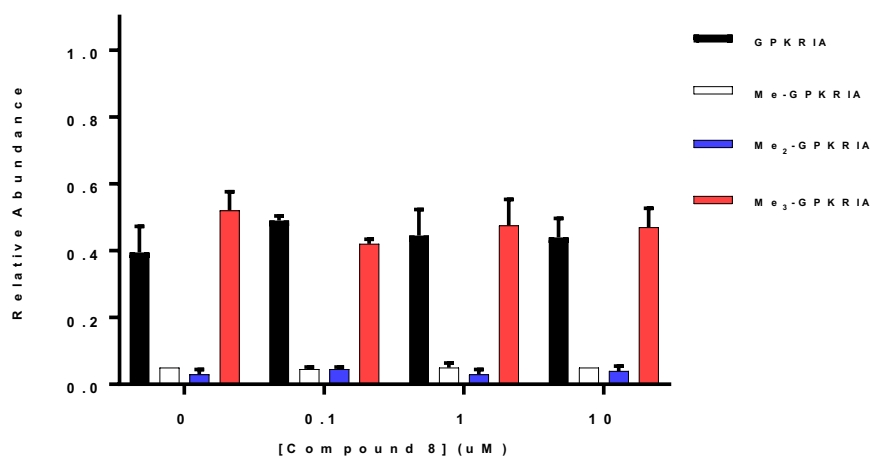

**Supporting Figure S2.** MALDI-MS methylation inhibition assay compound **8**. Quantification of methylation progression of GPKRIA by NTMT1 with **8** at 20 min (n=2).

**Table S1. Selectivity evaluation of compound 3**

| Enzyme activity (%) <sup>a</sup> | [3] ( $\mu\text{M}$ ) |     |     |     | IC <sub>50</sub> ( $\mu\text{M}$ ) |
|----------------------------------|-----------------------|-----|-----|-----|------------------------------------|
|                                  | 3.7                   | 11  | 33  | 100 |                                    |
| G9a                              | 95                    | 94  | 88  | 78  | >100                               |
| SETD7                            | 101                   | 106 | 101 | 86  | >100                               |
| PRMT1                            | 98                    | 93  | 78  | 47  | >33                                |
| PRMT3                            | 98                    | 87  | 58  | 26  | >33                                |
| <i>Tb</i> PRMT7                  | 93                    | 82  | 60  | 30  | >33                                |
| NNMT                             | 99                    | 97  | 97  | 93  | >100                               |
| SAHH                             | 84                    | 71  | 57  | 40  | >33                                |

<sup>a</sup>The values of enzyme activity are mean values of duplicate experiments (n = 2).

**Table S2. Crystallography data and refinement statistics.**

| <b>Data Collection</b>                   | <b>NTMT1-NAH-C2-GPKRIA</b> | <b>NTMT1-NAH-C5-GPKRIA</b> |
|------------------------------------------|----------------------------|----------------------------|
| $\lambda$ (Å)                            | 0.97934                    | 1.0332                     |
| Space group                              | P3 <sub>1</sub> 21         | P3 <sub>1</sub> 21         |
| a, b, c (Å)                              | 72.80, 72.80, 80.13        | 72.95, 72.95, 82.09        |
| $\alpha, \beta, \gamma$ (°)              | 90, 90, 120                | 90, 90, 120                |
| Resolution (Å)*                          | 50 - 1.42 (1.44 - 1.42)    | 30 - 1.50 (1.53 - 1.50)    |
| Completeness (%)*                        | 99.93 (99.78)              | 99.8 (98.3)                |
| Redundancy*                              | 6.5 (9.3)                  | 5.3 (5.3)                  |
| $R_{\text{sym}}^{\dagger}$               | 0.12 (1.3)                 | 0.05 (3.3)                 |
| $I / \sigma(I)^*$                        | 20.4 (1.0)                 | 14.5 (0.4)                 |
| $CC_{1/2}$                               | 0.99 (0.46)                | 1.0 (0.17)                 |
| <b>Refinement</b>                        |                            |                            |
| Resolution (Å)                           | 24.59 – 1.42               | 30 – 1.50                  |
| No. reflections                          | 46403                      | 41,064                     |
| $R^{\S}/R_{\text{free}}^{\P}$            | 0.16/0.18                  | 0.21/0.23                  |
| <b>r.m.s. deviations</b>                 |                            |                            |
| Bonds (Å)                                | 0.015                      | 0.003                      |
| Angles (°)                               | 1.702                      | 0.827                      |
| No. Protein atoms                        | 1743                       | 1858                       |
| No. Ligand atoms                         | 73                         | 102                        |
| No. Waters                               | 233                        | 182                        |
| <b>B-factors (Å<sup>2</sup>)</b>         |                            |                            |
| Wilson B                                 | 16.51                      | 28.86                      |
| Protein                                  | 23.31                      | 37.09                      |
| Ligands                                  | 26.50                      | 50.88                      |
| Waters                                   | 37.19                      | 45.22                      |
| <b>Ramachandran Analysis<sup>‡</sup></b> |                            |                            |
| Favored (%)                              | 96.77                      | 98.2                       |
| Allowed (%)                              | 2.76                       | 1.8                        |
| Outliers (%)                             | 0.46                       | 0                          |
| PDB code                                 | 6WJ7                       | 6PVB                       |

<sup>†</sup>  $R_{\text{sym}} = \sum_{hkl,j} (|I_{hkl} - \langle I_{hkl} \rangle|) / \sum_{hkl,j} I_{hkl}$ , where  $\langle I_{hkl} \rangle$  is the average intensity for a set of j symmetry related reflections and  $I_{hkl}$  is the value of the intensity for a single reflection within a set of symmetry-related reflections.

<sup>§</sup> R factor =  $\sum_{hkl} (||F_o| - |F_c||) / \sum_{hkl} |F_o|$  where  $F_o$  is the observed structure factor amplitude and  $F_c$  is the calculated structure factor amplitude.

<sup>¶</sup>  $R_{\text{free}} = \sum_{hkl,T} (||F_o| - |F_c||) / \sum_{hkl,T} |F_o|$ , where a test set, T (5% of the data), is omitted from the refinement.

‡ Performed using Molprobit within PHENIX.

\* Indicates statistics for last resolution shell shown in parenthesis.
